# Supplementary material for: Effects of Organic Light-Emitting Diodes on Circadian Rhythm and Sleep
Source: PubMed Central journal article supplement — Psychiatry Investig. 2021 May 18;18(5):471–7. doi: 10.30773/pi.2020.0348 (PMC8169338; doi:10.30773/pi.2020.0348), 2021-05-18
Supplement: pi-2020-0348-suppl.pdf [file pi-2020-0348-suppl.pdf]

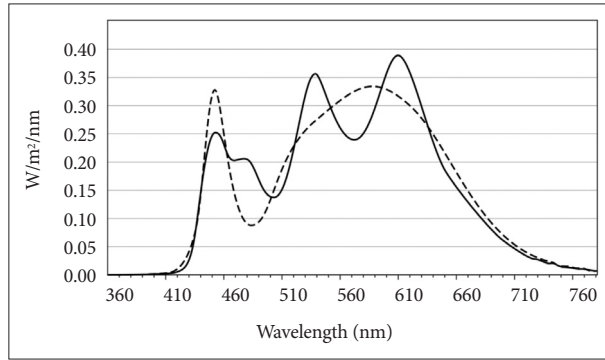

**Supplementary Figure 1.** Spectral power distributions of light from organic light-emitting diodes (solid line) and light-emitting diodes (dotted line).
